# Supplementary material for: A Supramolecular Photosensitizer System Based on Nano-Cu/ZIF-8 Capped with Water-Soluble Pillar[6]arene and Methylene Blue Host–Guest Complexations
Source: Molecules. 2021 Jun 25;26(13):3878. doi: 10.3390/molecules26133878 (PMC8271439; doi:10.3390/molecules26133878)
Supplement: Supplementary file 1 [file molecules-26-03878-s001.zip › molecules-1263626-supplementary.pdf]

## **Supplementary Materials**

# **A supramolecular photosensitizer system based on nano-Cu@ZIF-8 capped with water-soluble pillar[6]arene and methylene blue host–guest complexations**

**Chenhao Hu<sup>1,+</sup>, Yueyuan Yu<sup>1,+</sup>, Shuang Chao<sup>1</sup>, Huidan Zhu,<sup>2</sup> Yuxin Pei,<sup>1</sup> Lan Chen<sup>2\*</sup> and Zhichao Pei <sup>1\*</sup>**

<sup>1</sup> Shaanxi Key Laboratory of Natural Products & Chemical Biology, College of Chemistry and Pharmacy, Northwest A&F University, Yangling, Shaanxi 712100, P. R. China

<sup>2</sup> Analysis Center of College of Science & Technology, Hebei Agricultural University, Huanghua, Hebei 061100, P. R. China

\* Correspondence: peizc@nwafu.edu.cn.; Tel.: +86 2987091196 ; chenlan19860303@126.com.; Tel.: +86 3175605225

+ These authors contributed equally to this work.

## **Contents**

### **1. Materials and methods**

### **2. Characterization of the compounds**

### **3. UV-vis and NMR studies of host-guest complexation of WP6 and MB**

### **4. Cu/ZIF-8 Dynamic light scattering**

### **5. Powder X-ray characterization for their materials**

### **6. Zeta potential studies of OCZWM**

### **7. Scanning electron microscope (SEM)**

### **8. References**

## 1. Materials and methods

All commercially available starting materials and solvents were of reagent grade and dried prior to use. Chemical reactions were monitored with thin-layer chromatography using precoated silica gel 60 (0.25 mm thickness) plates. Flash column chromatography was performed on silica gel 60 (0.040-0.063 mm). Optical rotations were measured at the sodium D line at ambient temperature.  $^1\text{H}$  and  $^{13}\text{C}$  spectra were recorded with a 500 MHz instrument at 298K in DMSO- $d_6$ ,  $\text{CD}_3\text{OD}$ ,  $\text{CDCl}_3$ , using the residual signals from DMSO- $d_6$  ( $^1\text{H}$ :  $\delta = 2.50$  ppm),  $\text{CD}_3\text{OD}$  ( $^1\text{H}$ :  $\delta = 3.34$  ppm) and  $\text{CDCl}_3$  ( $^1\text{H}$ :  $\delta = 7.27$  ppm) as internal standard.

## 2. Characterization of the compounds

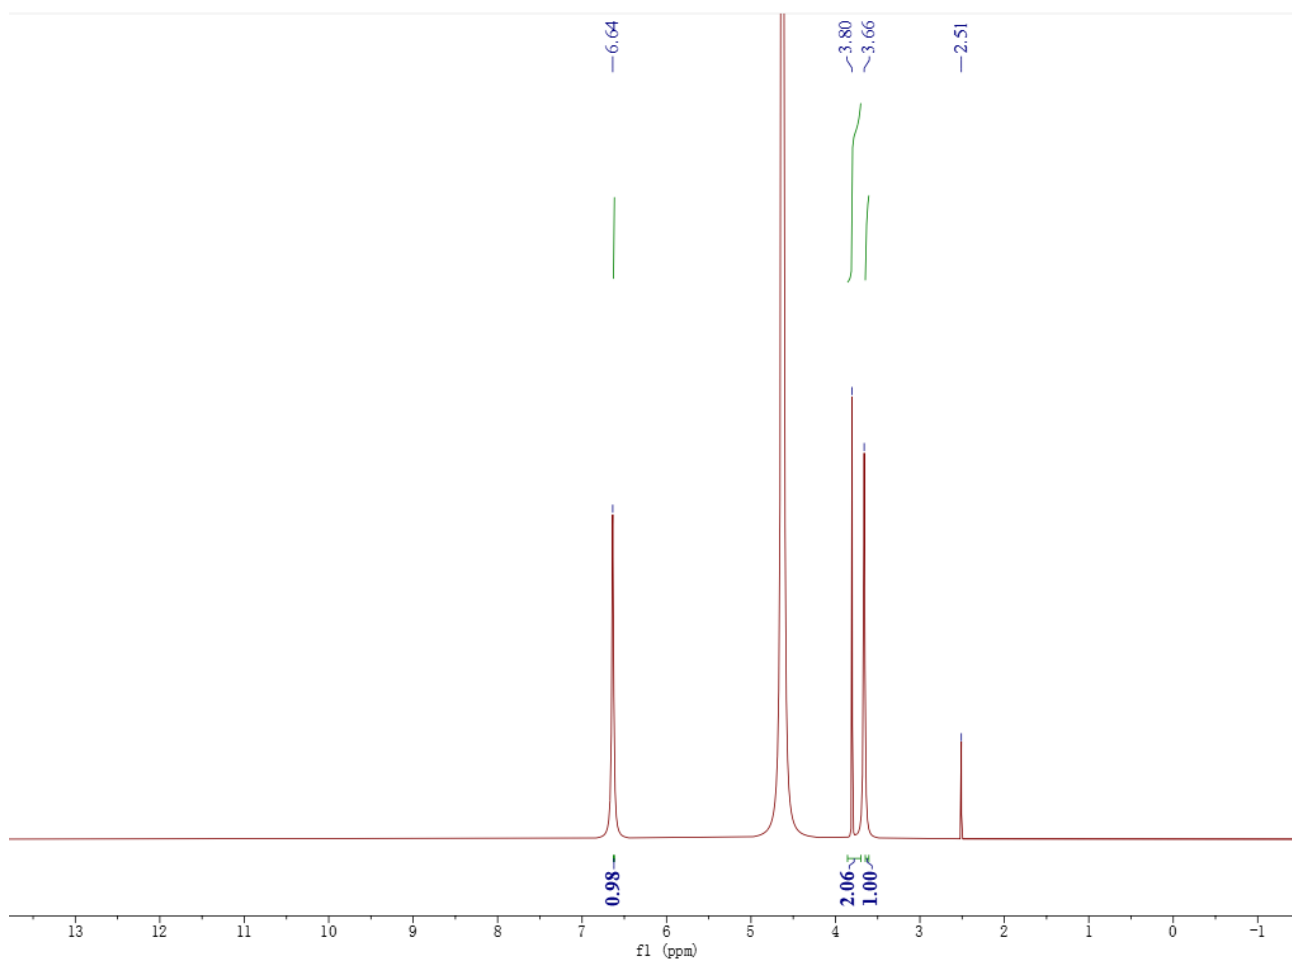

**Figure S1.**  $^1\text{H}$  NMR spectrum (400 MHz,  $\text{D}_2\text{O}$ ) of **WP6**.

### 3. UV-vis and NMR studies of host-guest complexation of WP6 and MB

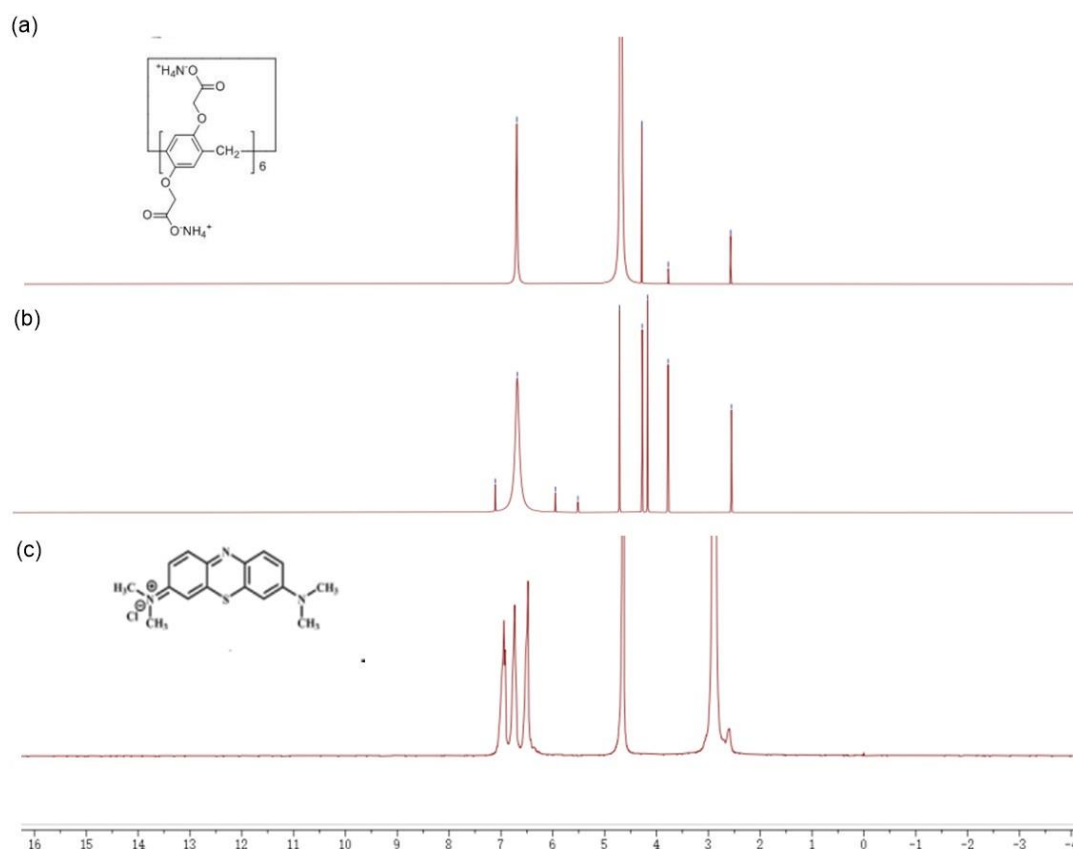

**Figure S2.**  $^1\text{H}$  NMR spectra (400 MHz,  $\text{D}_2\text{O}$ , 298 K): (a) WP6 (10.00 mM), (b) WP6:MB = 1:1; (c) MB (10.00 mM).

### 4. Cu/ZIF-8 Dynamic light scattering

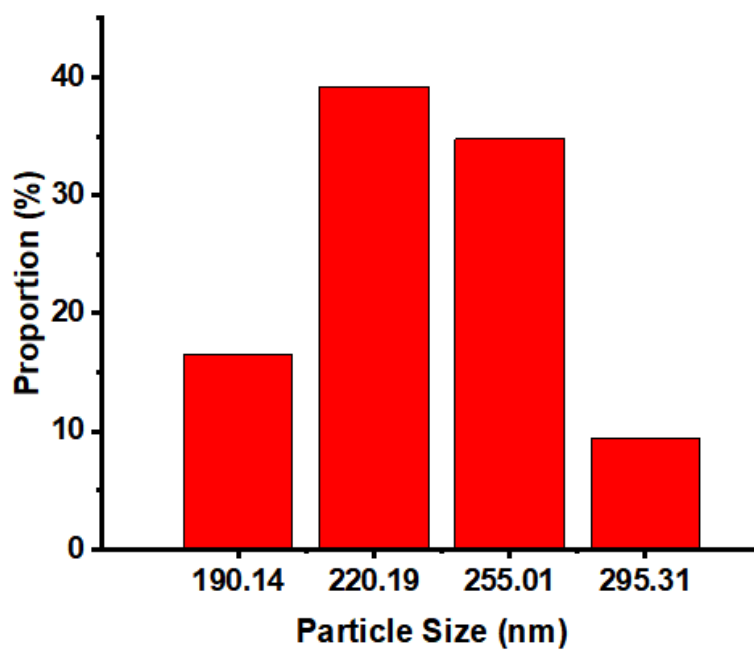

**Figure S3.** DLS data of Cu/ZIF-8

5. Powder X-ray characterization for their materials

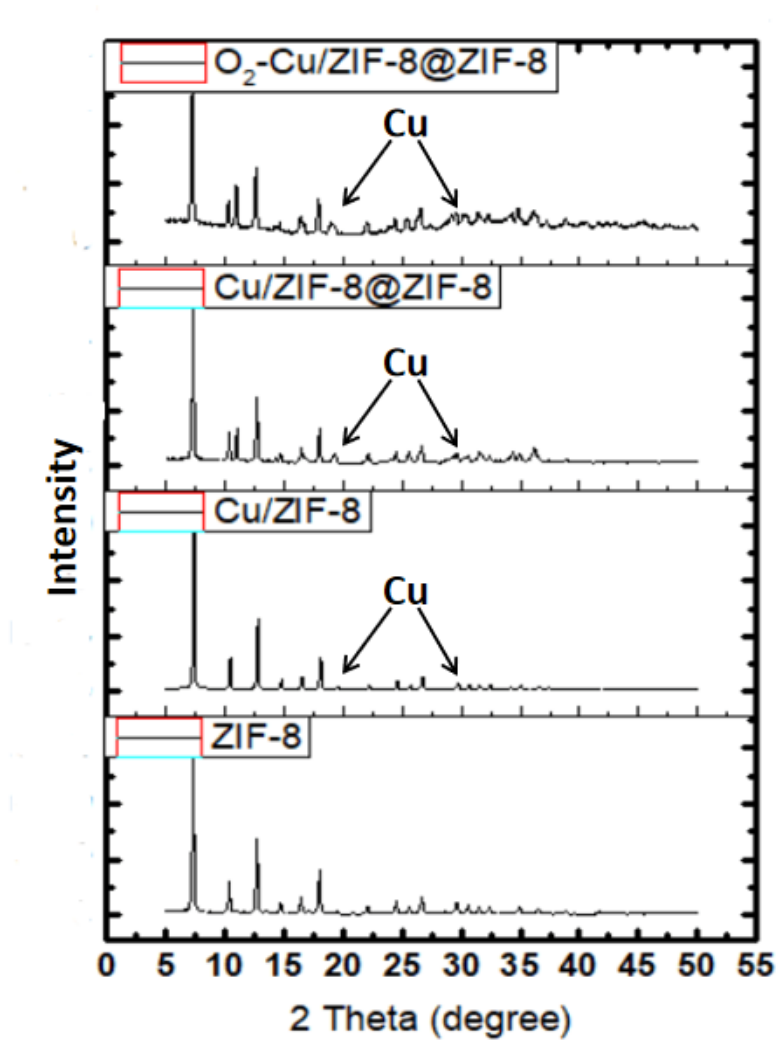

Figure S4. PXRD patterns of different materials

6. Zeta potential studies of OCZWM

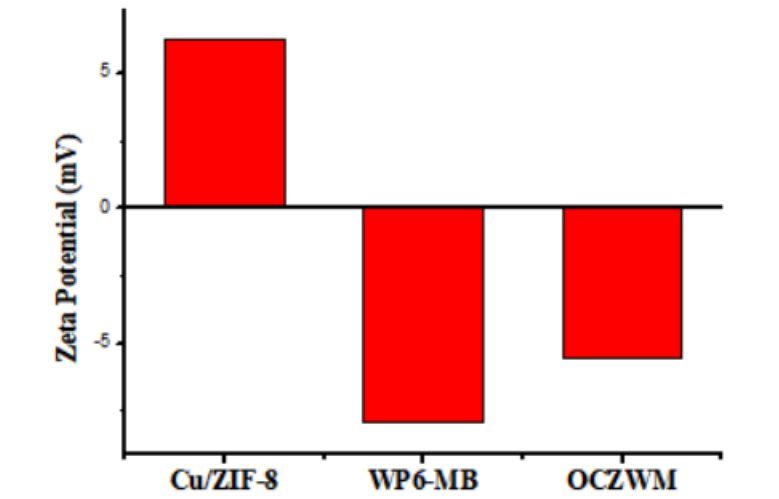

Figure S5. Zeta potential studies of OCZWM

## 7. Scanning electron microscope (SEM)

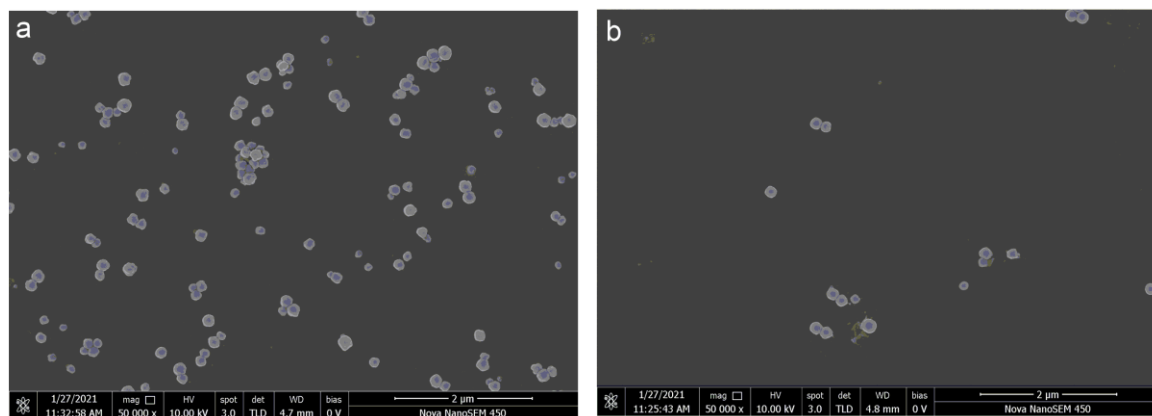

**Figure S6.** SEM images of Cu/ZIF-8 (a), Cu/ZIF-8@ZIF-8. The scale bar is 2 μm

## 8. References

- S1.** X. Hu, Z. Chen, L. Chen, L. Zhang, J. Hou and Z. Li, Chem. Commun., 2012, 48, 10999-11001.
- S2.** L. Shangguan, Q. Chen, B. Shi and F. Huang, Chem. Commun., 2017, 53, 9749-9752.
- S3.** D. Xia, G. Yu, J. Li and F. Huang, Chem. Commun., 2014, 50, 3606-3608.
